# Supplementary material for: From Mouse to Human: Cellular Morphometric Subtype Learned From Mouse Mammary Tumors Provides Prognostic Value in Human Breast Cancer
Source: Front Oncol. 2022 Feb 11;11:819565. doi: 10.3389/fonc.2021.819565 (PMC8886672; doi:10.3389/fonc.2021.819565)
Supplement: Supplementary file 11 [file Table_10.xlsx]

## Sheet: TableS13-TCGA_BRCA_DEG_MF
Supplementary Table 10. Gene ontology (GO) functional enrichment analysis of the differentially expressed genes (DEGs) for molecular function.
ID	Description	GeneRatio	BgRatio	pvalue	p.adjust	qvalue	geneID	Count
GO:0005540	hyaluronic acid binding	1987-03-01	21/17697	0.000143161	0.0173436	0.0132142	ACAN/HAPLN1/NCAN	3
GO:0005201	extracellular matrix structural constituent	1987-06-01	163/17697	0.000151916	0.0173436	0.0132142	ACAN/COL11A2/COL9A1/FGB/HAPLN1/OGN	6
GO:0030021	extracellular matrix structural constituent conferring compression resistance	1987-03-01	22/17697	0.000165178	0.0173436	0.0132142	ACAN/HAPLN1/OGN	3
GO:0000721	(R,R)-butanediol dehydrogenase activity	1987-01-01	1/17697	0.00491609	0.0703894	0.05363	SORD	1
GO:0001792	polymeric immunoglobulin receptor activity	1987-01-01	1/17697	0.00491609	0.0703894	0.05363	PIGR	1
GO:0003939	L-iditol 2-dehydrogenase activity	1987-01-01	1/17697	0.00491609	0.0703894	0.05363	SORD	1
GO:0004398	histidine decarboxylase activity	1987-01-01	1/17697	0.00491609	0.0703894	0.05363	HDC	1
GO:0004855	xanthine oxidase activity	1987-01-01	1/17697	0.00491609	0.0703894	0.05363	XDH	1
GO:0008843	endochitinase activity	1987-01-01	1/17697	0.00491609	0.0703894	0.05363	CHIT1	1
GO:0015552	propionate transmembrane transporter activity	1987-01-01	1/17697	0.00491609	0.0703894	0.05363	SLC5A8	1
GO:0016521	pituitary adenylate cyclase activating polypeptide activity	1987-01-01	1/17697	0.00491609	0.0703894	0.05363	ADCYAP1	1
GO:0016727	oxidoreductase activity, acting on CH or CH2 groups, oxygen as acceptor	1987-01-01	1/17697	0.00491609	0.0703894	0.05363	XDH	1
GO:0031320	hexitol dehydrogenase activity	1987-01-01	1/17697	0.00491609	0.0703894	0.05363	SORD	1
GO:0031858	pituitary adenylate cyclase-activating polypeptide receptor binding	1987-01-01	1/17697	0.00491609	0.0703894	0.05363	ADCYAP1	1
GO:0034899	trimethylamine monooxygenase activity	1987-01-01	1/17697	0.00491609	0.0703894	0.05363	FMO3	1
GO:0035757	chemokine (C-C motif) ligand 19 binding	1987-01-01	1/17697	0.00491609	0.0703894	0.05363	CCR7	1
GO:0035758	chemokine (C-C motif) ligand 21 binding	1987-01-01	1/17697	0.00491609	0.0703894	0.05363	CCR7	1
GO:0038117	C-C motif chemokine 19 receptor activity	1987-01-01	1/17697	0.00491609	0.0703894	0.05363	CCR7	1
GO:0038121	C-C motif chemokine 21 receptor activity	1987-01-01	1/17697	0.00491609	0.0703894	0.05363	CCR7	1
GO:0046526	D-xylulose reductase activity	1987-01-01	1/17697	0.00491609	0.0703894	0.05363	SORD	1
GO:0047886	farnesol dehydrogenase activity	1987-01-01	1/17697	0.00491609	0.0703894	0.05363	AKR1B15	1
GO:0050255	ribitol 2-dehydrogenase activity	1987-01-01	1/17697	0.00491609	0.0703894	0.05363	SORD	1
GO:0005158	insulin receptor binding	1987-02-01	22/17697	0.00517714	0.0709044	0.0540224	IGF2/IRS4	2
GO:0005539	glycosaminoglycan binding	1987-05-01	229/17697	0.005432	0.071295	0.05432	ACAN/CEL/HAPLN1/NCAN/SELL	5
GO:0019865	immunoglobulin binding	1987-02-01	24/17697	0.00614642	0.0774449	0.0590056	MS4A2/MS4A1	2
GO:0008194	UDP-glycosyltransferase activity	1987-04-01	151/17697	0.00655538	0.079421	0.0605112	B4GALNT2/LALBA/UGT2B4/UGT2B11	4
GO:0005184	neuropeptide hormone activity	1987-02-01	28/17697	0.00831152	0.083503	0.0636213	ADCYAP1/NTS	2
GO:0004181	metallocarboxypeptidase activity	1987-02-01	29/17697	0.00889887	0.083503	0.0636213	ACE2/CPA4	2
GO:0048018	receptor ligand activity	1987-07-01	482/17697	0.00956488	0.083503	0.0636213	ADCYAP1/FAM3D/IGF2/LTB/NTS/OGN/SCG2	7
GO:0003990	acetylcholinesterase activity	1987-01-01	2/17697	0.00980828	0.083503	0.0636213	BCHE	1
GO:0004667	prostaglandin-D synthase activity	1987-01-01	2/17697	0.00980828	0.083503	0.0636213	PTGDS	1
GO:0004854	xanthine dehydrogenase activity	1987-01-01	2/17697	0.00980828	0.083503	0.0636213	XDH	1
GO:0005052	peroxisome matrix targeting signal-1 binding	1987-01-01	2/17697	0.00980828	0.083503	0.0636213	PEX5L	1
GO:0015636	short-chain fatty acid transmembrane transporter activity	1987-01-01	2/17697	0.00980828	0.083503	0.0636213	SLC5A8	1
GO:0016726	oxidoreductase activity, acting on CH or CH2 groups, NAD or NADP as acceptor	1987-01-01	2/17697	0.00980828	0.083503	0.0636213	XDH	1
GO:0038102	activin receptor antagonist activity	1987-01-01	2/17697	0.00980828	0.083503	0.0636213	IGSF1	1
GO:0097604	temperature-gated cation channel activity	1987-01-01	2/17697	0.00980828	0.083503	0.0636213	TRPA1	1
GO:0015020	glucuronosyltransferase activity	1987-02-01	33/17697	0.0114269	0.094723	0.0721699	UGT2B4/UGT2B11	2
GO:0004104	cholinesterase activity	1987-01-01	3/17697	0.0146767	0.110075	0.0838669	BCHE	1
GO:0004461	lactose synthase activity	1987-01-01	3/17697	0.0146767	0.110075	0.0838669	LALBA	1
GO:0044729	hemi-methylated DNA-binding	1987-01-01	3/17697	0.0146767	0.110075	0.0838669	WT1	1
GO:0097603	temperature-gated ion channel activity	1987-01-01	3/17697	0.0146767	0.110075	0.0838669	TRPA1	1
GO:0031406	carboxylic acid binding	1987-04-01	193/17697	0.0151206	0.110767	0.0843942	ACAN/HAPLN1/NCAN/PTGDS	4
GO:0030020	extracellular matrix structural constituent conferring tensile strength	1987-02-01	41/17697	0.0173023	0.123676	0.0942297	COL11A2/COL9A1	2
GO:0043177	organic acid binding	1987-04-01	205/17697	0.0184519	0.123676	0.0942297	ACAN/HAPLN1/NCAN/PTGDS	4
GO:0004568	chitinase activity	1987-01-01	4/17697	0.0195215	0.123676	0.0942297	CHIT1	1
GO:0033265	choline binding	1987-01-01	4/17697	0.0195215	0.123676	0.0942297	BCHE	1
GO:0047045	testosterone 17-beta-dehydrogenase (NADP+) activity	1987-01-01	4/17697	0.0195215	0.123676	0.0942297	AKR1B15	1
GO:0047655	allyl-alcohol dehydrogenase activity	1987-01-01	4/17697	0.0195215	0.123676	0.0942297	AKR1B15	1
GO:0004180	carboxypeptidase activity	1987-02-01	45/17697	0.020627	0.123676	0.0942297	ACE2/CPA4	2
GO:0016758	transferase activity, transferring hexosyl groups	1987-04-01	216/17697	0.0218779	0.123676	0.0942297	B4GALNT2/LALBA/UGT2B4/UGT2B11	4
GO:0005179	hormone activity	1987-03-01	122/17697	0.0222768	0.123676	0.0942297	ADCYAP1/IGF2/NTS	3
GO:0005262	calcium channel activity	1987-03-01	123/17697	0.0227544	0.123676	0.0942297	CHRNA9/GPM6A/TRPA1	3
GO:0000268	peroxisome targeting sequence binding	1987-01-01	5/17697	0.0243427	0.123676	0.0942297	PEX5L	1
GO:0000403	Y-form DNA binding	1987-01-01	5/17697	0.0243427	0.123676	0.0942297	MEN1	1
GO:0004499	N,N-dimethylaniline monooxygenase activity	1987-01-01	5/17697	0.0243427	0.123676	0.0942297	FMO3	1
GO:0004875	complement receptor activity	1987-01-01	5/17697	0.0243427	0.123676	0.0942297	CR2	1
GO:0010385	double-stranded methylated DNA binding	1987-01-01	5/17697	0.0243427	0.123676	0.0942297	WT1	1
GO:0019763	immunoglobulin receptor activity	1987-01-01	5/17697	0.0243427	0.123676	0.0942297	PIGR	1
GO:0019863	IgE binding	1987-01-01	5/17697	0.0243427	0.123676	0.0942297	MS4A2	1
GO:0030284	estrogen receptor activity	1987-01-01	5/17697	0.0243427	0.123676	0.0942297	GPER1	1
GO:0034711	inhibin binding	1987-01-01	5/17697	0.0243427	0.123676	0.0942297	IGSF1	1
GO:0005178	integrin binding	1987-03-01	132/17697	0.0273037	0.134538	0.102505	CD177/IGF2/TSPAN8	3
GO:0004064	arylesterase activity	1987-01-01	6/17697	0.0291404	0.134538	0.102505	CA2	1
GO:0015129	lactate transmembrane transporter activity	1987-01-01	6/17697	0.0291404	0.134538	0.102505	SLC5A8	1
GO:0043546	molybdopterin cofactor binding	1987-01-01	6/17697	0.0291404	0.134538	0.102505	XDH	1
GO:1905538	polysome binding	1987-01-01	6/17697	0.0291404	0.134538	0.102505	LIN28A	1
GO:1990239	steroid hormone binding	1987-01-01	6/17697	0.0291404	0.134538	0.102505	GPER1	1
GO:0052689	carboxylic ester hydrolase activity	1987-03-01	136/17697	0.0294702	0.134538	0.102505	BCHE/CA2/CEL	3
GO:0015276	ligand-gated ion channel activity	1987-03-01	138/17697	0.0305867	0.135702	0.103392	CHRNA9/GABRQ/TRPA1	3
GO:0022834	ligand-gated channel activity	1987-03-01	138/17697	0.0305867	0.135702	0.103392	CHRNA9/GABRQ/TRPA1	3
GO:0015085	calcium ion transmembrane transporter activity	1987-03-01	139/17697	0.0311533	0.136296	0.103844	CHRNA9/GPM6A/TRPA1	3
GO:0002151	G-quadruplex RNA binding	1987-01-01	7/17697	0.0339149	0.140568	0.1071	LIN28A	1
GO:0004771	sterol esterase activity	1987-01-01	7/17697	0.0339149	0.140568	0.1071	CEL	1
GO:0015245	fatty acid transmembrane transporter activity	1987-01-01	7/17697	0.0339149	0.140568	0.1071	SLC5A8	1
GO:0032051	clathrin light chain binding	1987-01-01	7/17697	0.0339149	0.140568	0.1071	NSG2	1
GO:0008235	metalloexopeptidase activity	1987-02-01	62/17697	0.037347	0.152248	0.115998	ACE2/CPA4	2
GO:0008061	chitin binding	1987-01-01	8/17697	0.0386661	0.152248	0.115998	CHIT1	1
GO:0010997	anaphase-promoting complex binding	1987-01-01	8/17697	0.0386661	0.152248	0.115998	CDC20B	1
GO:0097027	ubiquitin-protein transferase activator activity	1987-01-01	8/17697	0.0386661	0.152248	0.115998	CDC20B	1
GO:0042895	antibiotic transmembrane transporter activity	1987-01-01	9/17697	0.0433943	0.164689	0.125477	SLC5A8	1
GO:0043208	glycosphingolipid binding	1987-01-01	9/17697	0.0433943	0.164689	0.125477	SELL	1
GO:0140161	monocarboxylate:sodium symporter activity	1987-01-01	9/17697	0.0433943	0.164689	0.125477	SLC5A8	1
GO:0004252	serine-type endopeptidase activity	1987-03-01	160/17697	0.0443134	0.165356	0.125985	KLK14/TPSB2/TPSAB1	3
GO:0030246	carbohydrate binding	1987-04-01	271/17697	0.0446198	0.165356	0.125985	ACAN/NCAN/SELL/SORD	4
GO:0019531	oxalate transmembrane transporter activity	1987-01-01	10/17697	0.0480994	0.176178	0.134231	SLC26A3	1
GO:0016757	transferase activity, transferring glycosyl groups	1987-04-01	280/17697	0.0492525	0.176875	0.134762	B4GALNT2/LALBA/UGT2B4/UGT2B11	4
GO:0001618	virus receptor activity	1987-02-01	74/17697	0.0513782	0.176875	0.134762	ACE2/CR2	2
GO:0104005	hijacked molecular function	1987-02-01	74/17697	0.0513782	0.176875	0.134762	ACE2/CR2	2
GO:0030674	protein binding, bridging	1987-03-01	170/17697	0.05141	0.176875	0.134762	COL11A2/IRS4/MEN1	3
GO:0005230	extracellular ligand-gated ion channel activity	1987-02-01	75/17697	0.0526213	0.176875	0.134762	CHRNA9/GABRQ	2
GO:0004303	estradiol 17-beta-dehydrogenase activity	1987-01-01	11/17697	0.0527817	0.176875	0.134762	AKR1B15	1
GO:0015355	secondary active monocarboxylate transmembrane transporter activity	1987-01-01	11/17697	0.0527817	0.176875	0.134762	SLC5A8	1
GO:0052650	NADP-retinol dehydrogenase activity	1987-01-01	11/17697	0.0527817	0.176875	0.134762	AKR1B15	1
GO:0050662	coenzyme binding	1987-04-01	291/17697	0.0552633	0.183242	0.139613	FMO3/HDC/XDH/SORD	4
GO:0001540	amyloid-beta binding	1987-02-01	78/17697	0.0564144	0.18511	0.141036	BCHE/MARCO	2
GO:1990825	sequence-specific mRNA binding	1987-01-01	12/17697	0.0574412	0.185463	0.141305	LIN28A	1
GO:0050660	flavin adenine dinucleotide binding	1987-02-01	79/17697	0.0576995	0.185463	0.141305	FMO3/XDH	2
GO:0004175	endopeptidase activity	1987-05-01	427/17697	0.059278	0.186234	0.141893	ACE2/ECEL1/KLK14/TPSB2/TPSAB1	5
GO:0008237	metallopeptidase activity	1987-03-01	181/17697	0.0598128	0.186234	0.141893	ACE2/CPA4/ECEL1	3
GO:0008236	serine-type peptidase activity	1987-03-01	182/17697	0.060607	0.186234	0.141893	KLK14/TPSB2/TPSAB1	3
GO:0004032	alditol:NADP+ 1-oxidoreductase activity	1987-01-01	13/17697	0.062078	0.186234	0.141893	AKR1B15	1
GO:0008271	secondary active sulfate transmembrane transporter activity	1987-01-01	13/17697	0.062078	0.186234	0.141893	SLC26A3	1
GO:0016725	oxidoreductase activity, acting on CH or CH2 groups	1987-01-01	13/17697	0.062078	0.186234	0.141893	XDH	1
GO:0042043	neurexin family protein binding	1987-01-01	13/17697	0.062078	0.186234	0.141893	CEL	1
GO:0017171	serine hydrolase activity	1987-03-01	186/17697	0.0638333	0.189693	0.144528	KLK14/TPSB2/TPSAB1	3
GO:0004089	carbonate dehydratase activity	1987-01-01	15/17697	0.0712842	0.206005	0.156956	CA2	1
GO:0070492	oligosaccharide binding	1987-01-01	15/17697	0.0712842	0.206005	0.156956	SELL	1
GO:0070742	C2H2 zinc finger domain binding	1987-01-01	15/17697	0.0712842	0.206005	0.156956	WT1	1
GO:0022803	passive transmembrane transporter activity	1987-05-01	457/17697	0.0745689	0.207773	0.158303	CHRNA9/GABRQ/GPM6A/SLC5A8/TRPA1	5
GO:0000400	four-way junction DNA binding	1987-01-01	16/17697	0.0758537	0.207773	0.158303	MEN1	1
GO:0005159	insulin-like growth factor receptor binding	1987-01-01	16/17697	0.0758537	0.207773	0.158303	IGF2	1
GO:0015116	sulfate transmembrane transporter activity	1987-01-01	16/17697	0.0758537	0.207773	0.158303	SLC26A3	1
GO:0022848	acetylcholine-gated cation-selective channel activity	1987-01-01	16/17697	0.0758537	0.207773	0.158303	CHRNA9	1
GO:0023026	MHC class II protein complex binding	1987-01-01	16/17697	0.0758537	0.207773	0.158303	MS4A1	1
GO:0034185	apolipoprotein binding	1987-01-01	17/17697	0.080401	0.216464	0.164925	LRP4	1
GO:0055106	ubiquitin-protein transferase regulator activity	1987-01-01	17/17697	0.080401	0.216464	0.164925	CDC20B	1
GO:0015108	chloride transmembrane transporter activity	1987-02-01	100/17697	0.0868529	0.231853	0.17665	GABRQ/SLC26A3	2
GO:0004890	GABA-A receptor activity	1987-01-01	19/17697	0.0894293	0.234752	0.178859	GABRQ	1
GO:0015106	bicarbonate transmembrane transporter activity	1987-01-01	19/17697	0.0894293	0.234752	0.178859	SLC26A3	1
GO:0008329	signaling pattern recognition receptor activity	1987-01-01	20/17697	0.0939106	0.238358	0.181606	MARCO	1
GO:0005125	cytokine activity	1987-03-01	220/17697	0.0942944	0.238358	0.181606	FAM3D/LTB/SCG2	3
GO:0099094	ligand-gated cation channel activity	1987-02-01	105/17697	0.0943341	0.238358	0.181606	CHRNA9/TRPA1	2
GO:0001848	complement binding	1987-01-01	21/17697	0.0983701	0.238358	0.181606	CR2	1
GO:0004806	triglyceride lipase activity	1987-01-01	21/17697	0.0983701	0.238358	0.181606	CEL	1
GO:0008106	alcohol dehydrogenase (NADP+) activity	1987-01-01	21/17697	0.0983701	0.238358	0.181606	AKR1B15	1
GO:0015278	calcium-release channel activity	1987-01-01	21/17697	0.0983701	0.238358	0.181606	TRPA1	1
GO:0038187	pattern recognition receptor activity	1987-01-01	21/17697	0.0983701	0.238358	0.181606	MARCO	1
GO:0051428	peptide hormone receptor binding	1987-01-01	21/17697	0.0983701	0.238358	0.181606	ADCYAP1	1
GO:0051861	glycolipid binding	1987-01-01	21/17697	0.0983701	0.238358	0.181606	SELL	1
GO:0016917	GABA receptor activity	1987-01-01	22/17697	0.102808	0.245337	0.186923	GABRQ	1
GO:0051537	2 iron, 2 sulfur cluster binding	1987-01-01	22/17697	0.102808	0.245337	0.186923	XDH	1
GO:0008238	exopeptidase activity	1987-02-01	113/17697	0.106671	0.246537	0.187838	ACE2/CPA4	2
GO:0016493	C-C chemokine receptor activity	1987-01-01	23/17697	0.107224	0.246537	0.187838	CCR7	1
GO:0035250	UDP-galactosyltransferase activity	1987-01-01	23/17697	0.107224	0.246537	0.187838	LALBA	1
GO:0046625	sphingolipid binding	1987-01-01	23/17697	0.107224	0.246537	0.187838	SELL	1
GO:0070412	R-SMAD binding	1987-01-01	23/17697	0.107224	0.246537	0.187838	MEN1	1
GO:0009055	electron transfer activity	1987-02-01	114/17697	0.108243	0.247075	0.188248	MTCO2P12/XDH	2
GO:0060090	molecular adaptor activity	1987-03-01	237/17697	0.111395	0.249361	0.189989	COL11A2/IRS4/MEN1	3
GO:0000217	DNA secondary structure binding	1987-01-01	24/17697	0.111619	0.249361	0.189989	MEN1	1
GO:0019957	C-C chemokine binding	1987-01-01	24/17697	0.111619	0.249361	0.189989	CCR7	1
GO:0023023	MHC protein complex binding	1987-01-01	25/17697	0.115992	0.255949	0.195009	MS4A1	1
GO:0016616	oxidoreductase activity, acting on the CH-OH group of donors, NAD or NADP as acceptor	1987-02-01	119/17697	0.116193	0.255949	0.195009	AKR1B15/SORD	2
GO:0001637	G protein-coupled chemoattractant receptor activity	1987-01-01	26/17697	0.120344	0.259646	0.197826	CCR7	1
GO:0004033	aldo-keto reductase (NADP) activity	1987-01-01	26/17697	0.120344	0.259646	0.197826	AKR1B15	1
GO:0004950	chemokine receptor activity	1987-01-01	26/17697	0.120344	0.259646	0.197826	CCR7	1
GO:0004364	glutathione transferase activity	1987-01-01	27/17697	0.124675	0.265355	0.202175	GSTM5	1
GO:0099604	ligand-gated calcium channel activity	1987-01-01	27/17697	0.124675	0.265355	0.202175	TRPA1	1
GO:0004129	cytochrome-c oxidase activity	1987-01-01	28/17697	0.128985	0.265556	0.202329	MTCO2P12	1
GO:0005343	organic acid:sodium symporter activity	1987-01-01	28/17697	0.128985	0.265556	0.202329	SLC5A8	1
GO:0015002	heme-copper terminal oxidase activity	1987-01-01	28/17697	0.128985	0.265556	0.202329	MTCO2P12	1
GO:0016676	oxidoreductase activity, acting on a heme group of donors, oxygen as acceptor	1987-01-01	28/17697	0.128985	0.265556	0.202329	MTCO2P12	1
GO:0043425	bHLH transcription factor binding	1987-01-01	28/17697	0.128985	0.265556	0.202329	ASCL1	1
GO:0002020	protease binding	1987-02-01	128/17697	0.130858	0.265703	0.20244	CD177/SELL	2
GO:0016614	oxidoreductase activity, acting on CH-OH group of donors	1987-02-01	128/17697	0.130858	0.265703	0.20244	AKR1B15/SORD	2
GO:0016675	oxidoreductase activity, acting on a heme group of donors	1987-01-01	29/17697	0.133273	0.265703	0.20244	MTCO2P12	1
GO:0033764	steroid dehydrogenase activity, acting on the CH-OH group of donors, NAD or NADP as acceptor	1987-01-01	29/17697	0.133273	0.265703	0.20244	AKR1B15	1
GO:0043539	protein serine/threonine kinase activator activity	1987-01-01	29/17697	0.133273	0.265703	0.20244	IGF2	1
GO:0043548	phosphatidylinositol 3-kinase binding	1987-01-01	30/17697	0.137541	0.272487	0.207609	IRS4	1
GO:0005164	tumor necrosis factor receptor binding	1987-01-01	31/17697	0.141788	0.273778	0.208593	LTB	1
GO:0005231	excitatory extracellular ligand-gated ion channel activity	1987-01-01	31/17697	0.141788	0.273778	0.208593	CHRNA9	1
GO:0015301	anion:anion antiporter activity	1987-01-01	31/17697	0.141788	0.273778	0.208593	SLC26A3	1
GO:0035198	miRNA binding	1987-01-01	31/17697	0.141788	0.273778	0.208593	LIN28A	1
GO:0019956	chemokine binding	1987-01-01	32/17697	0.146015	0.273778	0.208593	CCR7	1
GO:0031369	translation initiation factor binding	1987-01-01	32/17697	0.146015	0.273778	0.208593	LIN28A	1
GO:0031624	ubiquitin conjugating enzyme binding	1987-01-01	32/17697	0.146015	0.273778	0.208593	TRIM72	1
GO:0071855	neuropeptide receptor binding	1987-01-01	32/17697	0.146015	0.273778	0.208593	ADCYAP1	1
GO:0071949	FAD binding	1987-01-01	32/17697	0.146015	0.273778	0.208593	XDH	1
GO:0005216	ion channel activity	1987-04-01	416/17697	0.148542	0.275113	0.20961	CHRNA9/GABRQ/GPM6A/TRPA1	4
GO:0005154	epidermal growth factor receptor binding	1987-01-01	33/17697	0.150221	0.275113	0.20961	MS4A1	1
GO:0005217	intracellular ligand-gated ion channel activity	1987-01-01	33/17697	0.150221	0.275113	0.20961	TRPA1	1
GO:0048019	receptor antagonist activity	1987-01-01	33/17697	0.150221	0.275113	0.20961	IGSF1	1
GO:0005504	fatty acid binding	1987-01-01	34/17697	0.154406	0.281144	0.214205	PTGDS	1
GO:0005501	retinoid binding	1987-01-01	35/17697	0.158571	0.282203	0.215012	PTGDS	1
GO:0016229	steroid dehydrogenase activity	1987-01-01	35/17697	0.158571	0.282203	0.215012	AKR1B15	1
GO:0016831	carboxy-lyase activity	1987-01-01	35/17697	0.158571	0.282203	0.215012	HDC	1
GO:1901682	sulfur compound transmembrane transporter activity	1987-01-01	35/17697	0.158571	0.282203	0.215012	SLC26A3	1
GO:0022838	substrate-specific channel activity	1987-04-01	428/17697	0.159599	0.282437	0.21519	CHRNA9/GABRQ/GPM6A/TRPA1	4
GO:0015103	inorganic anion transmembrane transporter activity	1987-02-01	146/17697	0.161332	0.283179	0.215756	GABRQ/SLC26A3	2
GO:0008378	galactosyltransferase activity	1987-01-01	36/17697	0.162716	0.283179	0.215756	LALBA	1
GO:0019840	isoprenoid binding	1987-01-01	36/17697	0.162716	0.283179	0.215756	PTGDS	1
GO:0044390	ubiquitin-like protein conjugating enzyme binding	1987-01-01	37/17697	0.16684	0.288762	0.220009	TRIM72	1
GO:0046873	metal ion transmembrane transporter activity	1987-04-01	438/17697	0.169042	0.290975	0.221695	CHRNA9/GPM6A/SLC5A8/TRPA1	4
GO:0042056	chemoattractant activity	1987-01-01	38/17697	0.170945	0.291715	0.222259	SCG2	1
GO:0005342	organic acid transmembrane transporter activity	1987-02-01	153/17697	0.173513	0.291715	0.222259	SLC26A3/SLC5A8	2
GO:0046943	carboxylic acid transmembrane transporter activity	1987-02-01	153/17697	0.173513	0.291715	0.222259	SLC26A3/SLC5A8	2
GO:0005310	dicarboxylic acid transmembrane transporter activity	1987-01-01	39/17697	0.175029	0.291715	0.222259	SLC26A3	1
GO:0016709	oxidoreductase activity, acting on paired donors, with incorporation or reduction of molecular oxygen, NAD(P)H as one donor, and incorporation of one atom of oxygen	1987-01-01	39/17697	0.175029	0.291715	0.222259	FMO3	1
GO:0061980	regulatory RNA binding	1987-01-01	39/17697	0.175029	0.291715	0.222259	LIN28A	1
GO:0042277	peptide binding	1987-03-01	295/17697	0.177273	0.2939	0.223924	BCHE/MARCO/PEX5L	3
GO:0030547	receptor inhibitor activity	1987-01-01	41/17697	0.183139	0.302035	0.230122	IGSF1	1
GO:0015267	channel activity	1987-04-01	456/17697	0.186526	0.306019	0.233158	CHRNA9/GABRQ/GPM6A/TRPA1	4
GO:0008083	growth factor activity	1987-02-01	163/17697	0.191163	0.312001	0.237715	IGF2/OGN	2
GO:0015026	coreceptor activity	1987-01-01	44/17697	0.195155	0.313642	0.238966	IGSF1	1
GO:0018024	histone-lysine N-methyltransferase activity	1987-01-01	44/17697	0.195155	0.313642	0.238966	MEN1	1
GO:1901618	organic hydroxy compound transmembrane transporter activity	1987-01-01	44/17697	0.195155	0.313642	0.238966	SLC5A8	1
GO:0008201	heparin binding	1987-02-01	169/17697	0.201867	0.321441	0.244907	CEL/SELL	2
GO:0005048	signal sequence binding	1987-01-01	46/17697	0.203069	0.321441	0.244907	PEX5L	1
GO:0032813	tumor necrosis factor receptor superfamily binding	1987-01-01	46/17697	0.203069	0.321441	0.244907	LTB	1
GO:0008376	acetylgalactosaminyltransferase activity	1987-01-01	47/17697	0.206997	0.321453	0.244917	B4GALNT2	1
GO:0016860	intramolecular oxidoreductase activity	1987-01-01	47/17697	0.206997	0.321453	0.244917	PTGDS	1
GO:1904315	transmitter-gated ion channel activity involved in regulation of postsynaptic membrane potential	1987-01-01	47/17697	0.206997	0.321453	0.244917	CHRNA9	1
GO:0005261	cation channel activity	1987-03-01	319/17697	0.207159	0.321453	0.244917	CHRNA9/GPM6A/TRPA1	3
GO:0008509	anion transmembrane transporter activity	1987-03-01	327/17697	0.217371	0.332753	0.253526	GABRQ/SLC26A3/SLC5A8	3
GO:0008028	monocarboxylic acid transmembrane transporter activity	1987-01-01	50/17697	0.218666	0.332753	0.253526	SLC5A8	1
GO:0070888	E-box binding	1987-01-01	50/17697	0.218666	0.332753	0.253526	ASCL1	1
GO:0099529	neurotransmitter receptor activity involved in regulation of postsynaptic membrane potential	1987-01-01	50/17697	0.218666	0.332753	0.253526	CHRNA9	1
GO:0005044	scavenger receptor activity	1987-01-01	51/17697	0.222518	0.333244	0.2539	MARCO	1
GO:0005326	neurotransmitter transporter activity	1987-01-01	51/17697	0.222518	0.333244	0.2539	GABRQ	1
GO:0016830	carbon-carbon lyase activity	1987-01-01	51/17697	0.222518	0.333244	0.2539	HDC	1
GO:0005070	SH3/SH2 adaptor activity	1987-01-01	52/17697	0.226352	0.333244	0.2539	IRS4	1
GO:0050661	NADP binding	1987-01-01	52/17697	0.226352	0.333244	0.2539	FMO3	1
GO:0098960	postsynaptic neurotransmitter receptor activity	1987-01-01	52/17697	0.226352	0.333244	0.2539	CHRNA9	1
GO:0022839	ion gated channel activity	1987-03-01	334/17697	0.226394	0.333244	0.2539	CHRNA9/GABRQ/TRPA1	3
GO:0050839	cell adhesion molecule binding	1987-04-01	499/17697	0.230465	0.337658	0.257263	CD177/FGB/IGF2/TSPAN8	4
GO:0030170	pyridoxal phosphate binding	1987-01-01	54/17697	0.233962	0.338618	0.257994	HDC	1
GO:0070279	vitamin B6 binding	1987-01-01	54/17697	0.233962	0.338618	0.257994	HDC	1
GO:0016829	lyase activity	1987-02-01	187/17697	0.234345	0.338618	0.257994	CA2/HDC	2
GO:0042165	neurotransmitter binding	1987-01-01	55/17697	0.23774	0.340919	0.259748	BCHE	1
GO:0022836	gated channel activity	1987-03-01	343/17697	0.238102	0.340919	0.259748	CHRNA9/GABRQ/TRPA1	3
GO:0003707	steroid hormone receptor activity	1987-01-01	56/17697	0.241499	0.34113	0.259909	GPER1	1
GO:0016836	hydro-lyase activity	1987-01-01	56/17697	0.241499	0.34113	0.259909	CA2	1
GO:0051287	NAD binding	1987-01-01	56/17697	0.241499	0.34113	0.259909	SORD	1
GO:0030276	clathrin binding	1987-01-01	57/17697	0.245239	0.343335	0.261589	NSG2	1
GO:0042054	histone methyltransferase activity	1987-01-01	57/17697	0.245239	0.343335	0.261589	MEN1	1
GO:0001786	phosphatidylserine binding	1987-01-01	58/17697	0.248962	0.34396	0.262065	TRIM72	1
GO:0016765	transferase activity, transferring alkyl or aryl (other than methyl) groups	1987-01-01	58/17697	0.248962	0.34396	0.262065	GSTM5	1
GO:0099516	ion antiporter activity	1987-01-01	58/17697	0.248962	0.34396	0.262065	SLC26A3	1
GO:0005507	copper ion binding	1987-01-01	59/17697	0.252666	0.346043	0.263652	MTCO2P12	1
GO:0097110	scaffold protein binding	1987-01-01	59/17697	0.252666	0.346043	0.263652	LRP4	1
GO:0033218	amide binding	1987-03-01	356/17697	0.255195	0.347061	0.264428	BCHE/MARCO/PEX5L	3
GO:0016279	protein-lysine N-methyltransferase activity	1987-01-01	60/17697	0.256352	0.347061	0.264428	MEN1	1
GO:0016278	lysine N-methyltransferase activity	1987-01-01	61/17697	0.260021	0.347061	0.264428	MEN1	1
GO:0022824	transmitter-gated ion channel activity	1987-01-01	61/17697	0.260021	0.347061	0.264428	CHRNA9	1
GO:0022835	transmitter-gated channel activity	1987-01-01	61/17697	0.260021	0.347061	0.264428	CHRNA9	1
GO:0048306	calcium-dependent protein binding	1987-01-01	61/17697	0.260021	0.347061	0.264428	CD177	1
GO:0051536	iron-sulfur cluster binding	1987-01-01	63/17697	0.267304	0.353784	0.26955	XDH	1
GO:0051540	metal cluster binding	1987-01-01	63/17697	0.267304	0.353784	0.26955	XDH	1
GO:0033293	monocarboxylic acid binding	1987-01-01	64/17697	0.270918	0.357068	0.272052	PTGDS	1
GO:0008514	organic anion transmembrane transporter activity	1987-02-01	211/17697	0.278059	0.364952	0.278059	SLC26A3/SLC5A8	2
GO:0030971	receptor tyrosine kinase binding	1987-01-01	69/17697	0.28873	0.377386	0.287532	LRP4	1
GO:0015370	solute:sodium symporter activity	1987-01-01	72/17697	0.29921	0.389467	0.296737	SLC5A8	1
GO:0005254	chloride channel activity	1987-01-01	75/17697	0.309537	0.397976	0.30322	GABRQ	1
GO:0016835	carbon-oxygen lyase activity	1987-01-01	75/17697	0.309537	0.397976	0.30322	CA2	1
GO:0070405	ammonium ion binding	1987-01-01	75/17697	0.309537	0.397976	0.30322	BCHE	1
GO:0034987	immunoglobulin receptor binding	1987-01-01	76/17697	0.312946	0.400723	0.305313	IGHD	1
GO:0015291	secondary active transmembrane transporter activity	1987-02-01	237/17697	0.325266	0.411283	0.313359	SLC26A3/SLC5A8	2
GO:0030295	protein kinase activator activity	1987-01-01	80/17697	0.326415	0.411283	0.313359	IGF2	1
GO:0035591	signaling adaptor activity	1987-01-01	80/17697	0.326415	0.411283	0.313359	IRS4	1
GO:0046332	SMAD binding	1987-01-01	80/17697	0.326415	0.411283	0.313359	MEN1	1
GO:0015297	antiporter activity	1987-01-01	85/17697	0.342886	0.428607	0.326558	SLC26A3	1
GO:0038024	cargo receptor activity	1987-01-01	85/17697	0.342886	0.428607	0.326558	MARCO	1
GO:0019209	kinase activator activity	1987-01-01	86/17697	0.346132	0.430955	0.328347	IGF2	1
GO:1901681	sulfur compound binding	1987-02-01	250/17697	0.34861	0.431565	0.328811	CEL/SELL	2
GO:0008276	protein methyltransferase activity	1987-01-01	87/17697	0.349362	0.431565	0.328811	MEN1	1
GO:0005253	anion channel activity	1987-01-01	89/17697	0.355775	0.436067	0.332242	GABRQ	1
GO:0072341	modified amino acid binding	1987-01-01	89/17697	0.355775	0.436067	0.332242	TRIM72	1
GO:0015238	drug transmembrane transporter activity	1987-01-01	92/17697	0.365278	0.445979	0.339793	SLC5A8	1
GO:1990782	protein tyrosine kinase binding	1987-01-01	93/17697	0.368415	0.448072	0.341388	LRP4	1
GO:0004553	hydrolase activity, hydrolyzing O-glycosyl compounds	1987-01-01	94/17697	0.371536	0.45013	0.342956	CHIT1	1
GO:0005496	steroid binding	1987-01-01	95/17697	0.374642	0.452154	0.344498	GPER1	1
GO:0004896	cytokine receptor activity	1987-01-01	96/17697	0.377733	0.452418	0.344699	CCR7	1
GO:0008170	N-methyltransferase activity	1987-01-01	96/17697	0.377733	0.452418	0.344699	MEN1	1
GO:0004497	monooxygenase activity	1987-01-01	99/17697	0.386915	0.46166	0.351741	FMO3	1
GO:0005200	structural constituent of cytoskeleton	1987-01-01	102/17697	0.395964	0.465405	0.354594	DES	1
GO:0015294	solute:cation symporter activity	1987-01-01	102/17697	0.395964	0.465405	0.354594	SLC5A8	1
GO:0042562	hormone binding	1987-01-01	102/17697	0.395964	0.465405	0.354594	GPER1	1
GO:0051087	chaperone binding	1987-01-01	102/17697	0.395964	0.465405	0.354594	FGB	1
GO:0004222	metalloendopeptidase activity	1987-01-01	103/17697	0.39895	0.467172	0.355941	ECEL1	1
GO:0001664	G protein-coupled receptor binding	1987-02-01	280/17697	0.401382	0.468279	0.356784	ADCYAP1/MARCO	2
GO:0047485	protein N-terminus binding	1987-01-01	109/17697	0.416567	0.484201	0.368915	MEN1	1
GO:0016798	hydrolase activity, acting on glycosyl bonds	1987-01-01	117/17697	0.439263	0.506842	0.386165	CHIT1	1
GO:0030594	neurotransmitter receptor activity	1987-01-01	117/17697	0.439263	0.506842	0.386165	CHRNA9	1
GO:0016298	lipase activity	1987-01-01	127/17697	0.46641	0.536201	0.408534	CEL	1
GO:0019955	cytokine binding	1987-01-01	128/17697	0.469052	0.537278	0.409354	CCR7	1
GO:0005319	lipid transporter activity	1987-01-01	131/17697	0.476901	0.544289	0.414697	SLC5A8	1
GO:0015078	proton transmembrane transporter activity	1987-01-01	133/17697	0.48207	0.54623	0.416175	MTCO2P12	1
GO:0043021	ribonucleoprotein complex binding	1987-01-01	133/17697	0.48207	0.54623	0.416175	LIN28A	1
GO:0070851	growth factor receptor binding	1987-01-01	134/17697	0.484635	0.547169	0.416891	MS4A1	1
GO:0019842	vitamin binding	1987-01-01	138/17697	0.494772	0.556619	0.42409	HDC	1
GO:0015293	symporter activity	1987-01-01	144/17697	0.509609	0.57127	0.435253	SLC5A8	1
GO:0008528	G protein-coupled peptide receptor activity	1987-01-01	146/17697	0.514458	0.574661	0.437837	CCR7	1
GO:0015081	sodium ion transmembrane transporter activity	1987-01-01	149/17697	0.521643	0.580628	0.442383	SLC5A8	1
GO:0001653	peptide receptor activity	1987-01-01	152/17697	0.528723	0.584379	0.445241	CCR7	1
GO:0005506	iron ion binding	1987-01-01	152/17697	0.528723	0.584379	0.445241	XDH	1
GO:0022804	active transmembrane transporter activity	1987-02-01	362/17697	0.53406	0.587963	0.447972	SLC26A3/SLC5A8	2
GO:0008757	S-adenosylmethionine-dependent methyltransferase activity	1987-01-01	155/17697	0.5357	0.587963	0.447972	MEN1	1
GO:0016853	isomerase activity	1987-01-01	158/17697	0.542574	0.593441	0.452145	PTGDS	1
GO:0016705	oxidoreductase activity, acting on paired donors, with incorporation or reduction of molecular oxygen	1987-01-01	159/17697	0.544843	0.59386	0.452465	FMO3	1
GO:0003823	antigen binding	1987-01-01	160/17697	0.547101	0.594265	0.452773	IGHD	1
GO:0015077	monovalent inorganic cation transmembrane transporter activity	1987-02-01	382/17697	0.563315	0.609774	0.46459	MTCO2P12/SLC5A8	2
GO:0004866	endopeptidase inhibitor activity	1987-01-01	175/17697	0.57967	0.625329	0.476441	OPRPN	1
GO:0019887	protein kinase regulator activity	1987-01-01	180/17697	0.590003	0.634304	0.483279	IGF2	1
GO:0030414	peptidase inhibitor activity	1987-01-01	182/17697	0.594066	0.634341	0.483308	OPRPN	1
GO:0061135	endopeptidase regulator activity	1987-01-01	182/17697	0.594066	0.634341	0.483308	OPRPN	1
GO:0051427	hormone receptor binding	1987-01-01	185/17697	0.600085	0.638604	0.486556	ADCYAP1	1
GO:0051015	actin filament binding	1987-01-01	198/17697	0.625166	0.663055	0.505184	CORO6	1
GO:0001228	DNA-binding transcription activator activity, RNA polymerase II-specific	1987-02-01	439/17697	0.639444	0.675923	0.514989	PAX5/WT1	2
GO:0019207	kinase regulator activity	1987-01-01	207/17697	0.641612	0.675946	0.515006	IGF2	1
GO:0008168	methyltransferase activity	1987-01-01	215/17697	0.655631	0.688412	0.524504	MEN1	1
GO:0061134	peptidase regulator activity	1987-01-01	219/17697	0.662435	0.693246	0.528188	OPRPN	1
GO:0061630	ubiquitin protein ligase activity	1987-01-01	221/17697	0.665787	0.694447	0.529103	TRIM72	1
GO:0016741	transferase activity, transferring one-carbon groups	1987-01-01	226/17697	0.674025	0.700719	0.533881	MEN1	1
GO:0061659	ubiquitin-like protein ligase activity	1987-01-01	230/17697	0.68047	0.705092	0.537213	TRIM72	1
GO:0001227	DNA-binding transcription repressor activity, RNA polymerase II-specific	1987-01-01	242/17697	0.69906	0.72198	0.55008	ASCL1	1
GO:0005096	GTPase activator activity	1987-01-01	273/17697	0.742278	0.76411	0.582179	ARHGAP36	1
GO:0005126	cytokine receptor binding	1987-01-01	286/17697	0.75852	0.778286	0.59298	LTB	1
GO:0030695	GTPase regulator activity	1987-01-01	304/17697	0.779351	0.797064	0.607287	ARHGAP36	1
GO:0060589	nucleoside-triphosphatase regulator activity	1987-01-01	344/17697	0.819494	0.835406	0.6365	ARHGAP36	1
GO:0004857	enzyme inhibitor activity	1987-01-01	375/17697	0.845558	0.859196	0.654626	OPRPN	1
GO:0004842	ubiquitin-protein transferase activity	1987-01-01	382/17697	0.850908	0.861852	0.656649	TRIM72	1
GO:0019787	ubiquitin-like protein transferase activity	1987-01-01	407/17697	0.86856	0.876912	0.668123	TRIM72	1
GO:0005543	phospholipid binding	1987-01-01	427/17697	0.881181	0.886371	0.67533	TRIM72	1
GO:0003779	actin binding	1987-01-01	431/17697	0.883557	0.886371	0.67533	CORO6	1
GO:0031267	small GTPase binding	1987-01-01	443/17697	0.890408	0.890408	0.678406	PEX5L	1
